# Supplementary material
Source: HighWire-hosted journal article supplement (https://cmaj.ca/highwire/filestream/57740/field_highwire_adjunct_files/2/registration-will-appendix_3.pdf)
Supplement: registration-will-appendix_3.pdf [file registration-will-appendix_3.pdf]

**Appendix 3:** Geographical distribution of all observational studies registered in ClinicalTrials.gov as of March 26, 2010

| <b>Region*</b>                         | <b>Number of observational studies (n = 14 595)<sup>†</sup></b> | <b>Percentage of all observational studies</b> |
|----------------------------------------|-----------------------------------------------------------------|------------------------------------------------|
| Africa                                 | 156                                                             | 1%                                             |
| Central America and Caribbean          | 101                                                             | 1%                                             |
| South America                          | 242                                                             | 2%                                             |
| Eastern Asia                           | 1 023                                                           | 7%                                             |
| Southern and Central Asia              | 110                                                             | 1%                                             |
| Southeastern Asia                      | 182                                                             | 1%                                             |
| Western Asia                           | 618                                                             | 4%                                             |
| Oceania (e.g., Australia, New Zealand) | 177                                                             | 1%                                             |
| Europe                                 | 2 970                                                           | 20%                                            |
| Northern America                       | 7 686                                                           | 53%                                            |
| - Canada                               | 667                                                             | 5%                                             |
| - United States                        | 7 178                                                           | 49%                                            |
| - Mexico                               | 56                                                              | 0%                                             |
| Missing                                | 2 066                                                           | 14%                                            |

\*Countries classified according to United Nations (<http://unstats.un.org/unsd/methods/m49/m49regin.htm>).

<sup>†</sup>81% (n = 11 855) were conducted in a single country, and 5% (n = 674) were in more than one country; the remainder were missing location information.
